# Supplementary material
Source: publisher figshare collection journal article supplement (https://acs.figshare.com/ndownloader/files/5740320)
Supplement: Supplementary file 1 [file 5740320]

## SUPPORTING INFORMATION

### **Synthesis, Solid-State Crystal Structure and Reactivity of a Monomeric Copper(I) Anilido Complex**

Elizabeth D. Blue<sup>Ψ</sup>, Amelia Davis<sup>Ψ</sup>, David Conner<sup>Ψ</sup>, T. Brent Gunnoe<sup>Ψ\*</sup>,  
Paul D. Boyle<sup>Ψ</sup>, P. S. White<sup>δ</sup>

#### Contents:

Kinetic Plots                      p. 2

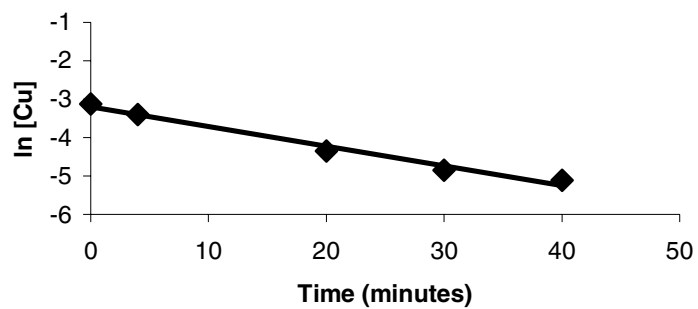

**Figure 5.** Kinetic plot for the reaction of (dtbpe)Cu(NHPh) (**6**) with ten equivalents of EtBr at room temperature.

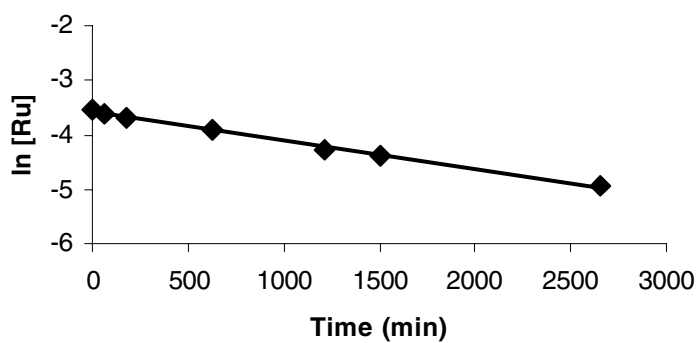

**Figure 6.** Kinetic plot for the reaction of TpRu(PMe<sub>3</sub>)<sub>2</sub>(NHPh) with ten equivalents of EtBr at 80 °C.
